# Supplementary material
Source: publisher figshare collection journal article supplement (https://karger.figshare.com/articles/dataset/_/5126272)
Supplement: Supplementary file 1 [file 1 › 000360071_sm_Figures.pdf]

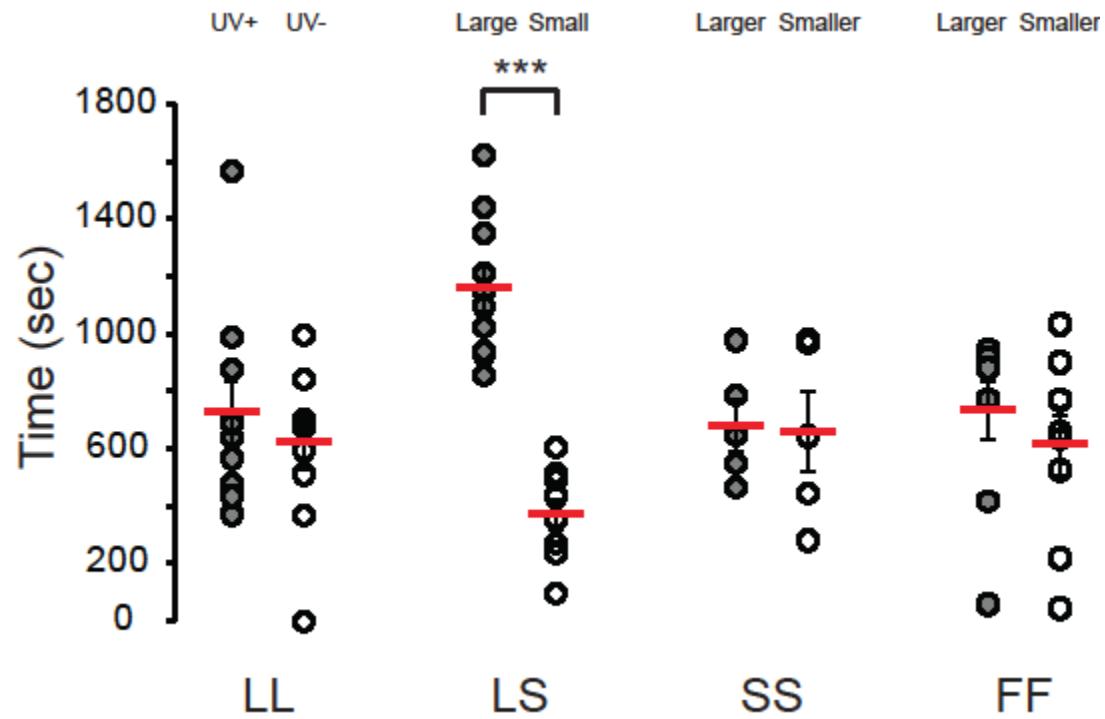

1

2 Supplementary Figure 1. Time spent next to each stimulus by treatment. Circles show female  
 3 response toward each stimulus with gray circles representing responses towards larger (LS, FF)  
 4 or UV+ (LL) phenotype. Red horizontal line is the mean with bars representing the standard  
 5 error. \*\*\*,  $p < 0.001$

A) LL

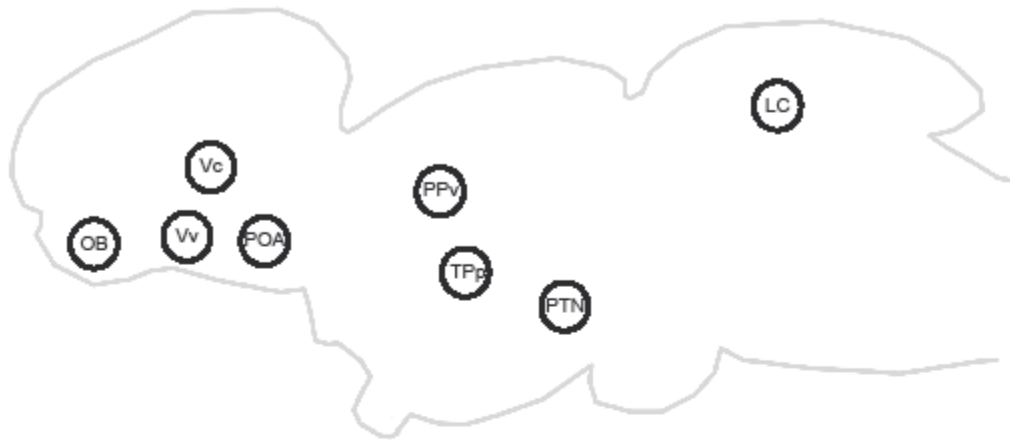

B) LS

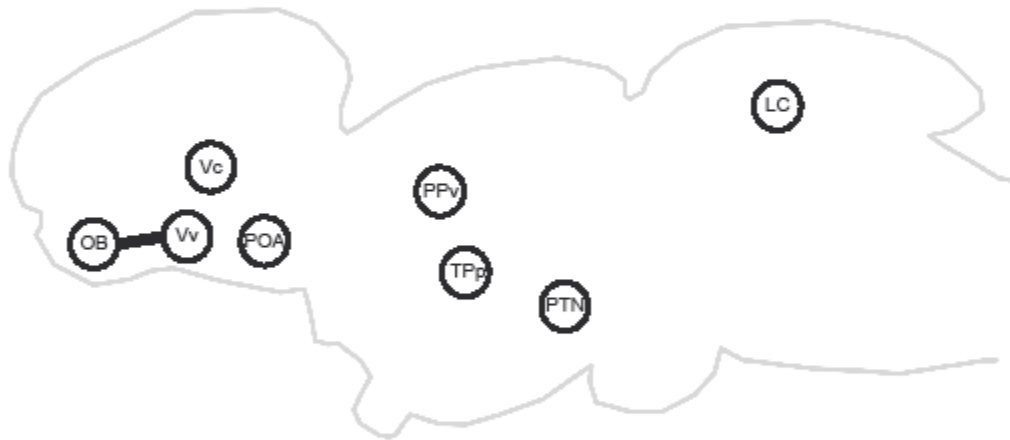

C) SS

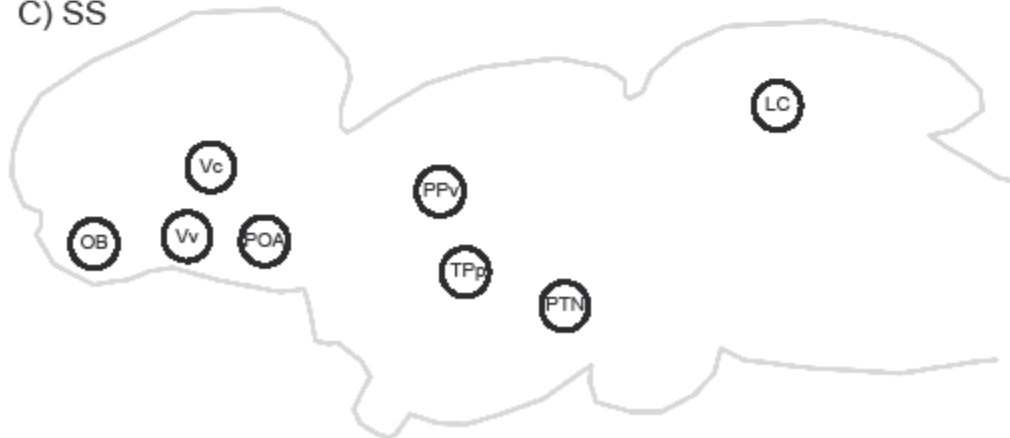

Supplementary Figure 2. *Tyrosine hydroxylase* expression network (correlation density pattern) by context. Unique significant positive pairwise correlations relative to FF and HT females in TH expression between brain regions (lines) in A) LL, B) LS, and C) SS exposed females.
