# Supplementary material
Source: publisher figshare collection journal article supplement (https://karger.figshare.com/articles/dataset/_/5126272)
Supplement: Supplementary file 1 [file 1 › 000360071_sm_Tables.pdf]

Supplementary Table 1. Correlation between a proxy for circulating estradiol levels and association bias, glides, transits, and gene (*neuroligin-3* and *tyrosine hydroxylase*) expression in different brain regions. \*\* indicates significance after correcting for multiple hypotheses; \* indicates significance that does not survive multiple hypothesis testing

|                             | LL                      |         | LS                      |            | SS                      |         | FF                      |         | HT                      |          |
|-----------------------------|-------------------------|---------|-------------------------|------------|-------------------------|---------|-------------------------|---------|-------------------------|----------|
|                             | Correlation coefficient | p-value | Correlation coefficient | p-value    | Correlation coefficient | p-value | Correlation coefficient | p-value | Correlation coefficient | p-value  |
| Association Bias            | -0.333                  | 0.346   | -0.018                  | 0.959      | -0.121                  | 0.845   | 0.312                   | 0.413   | N/A                     | N/A      |
| Glides                      | 0.422                   | 0.224   | 0.073                   | 0.84       | 0.8                     | 0.104   | 0.474                   | 0.196   | N/A                     | N/A      |
| Transits                    | 0.048                   | 0.893   | 0.793                   | ** (0.006) | -0.5                    | 0.391   | 0.6                     | 0.087   | N/A                     | N/A      |
| <i>Neuroligin-3</i>         |                         |         |                         |            |                         |         |                         |         |                         |          |
| cb                          | -0.392                  | 0.261   | 0.606                   | 0.062      | -0.286                  | 0.64    | -0.293                  | 0.442   | -0.756                  | 0.139    |
| DI                          | -0.288                  | 0.419   | 0.234                   | 0.515      | -0.374                  | 0.534   | -0.507                  | 0.162   | 0.237                   | 0.7      |
| Dm                          | -0.235                  | 0.512   | 0.029                   | 0.936      | -0.229                  | 0.71    | -0.49                   | 0.18    | 0.671                   | 0.214    |
| GC                          | -0.276                  | 0.471   | 0.533                   | 0.111      | -0.161                  | 0.795   | -0.069                  | 0.858   | -0.583                  | 0.301    |
| HV                          | -0.391                  | 0.263   | 0.321                   | 0.364      | -0.328                  | 0.589   | -0.355                  | 0.347   | -0.253                  | 0.68     |
| POA                         | -0.306                  | 0.388   | 0.305                   | 0.424      | 0.118                   | 0.85    | -0.411                  | 0.271   | 0.7                     | 0.187    |
| TA                          | -0.443                  | 0.198   | 0.359                   | 0.307      | -0.414                  | 0.487   | -0.327                  | 0.389   | -0.332                  | 0.585    |
| Vs                          | -0.416                  | 0.231   | 0.285                   | 0.424      | 0.114                   | 0.855   | -0.436                  | 0.239   | 0.785                   | 0.115    |
| Vv                          | -0.392                  | 0.262   | 0.417                   | 0.23       | -0.18                   | 0.771   | -0.45                   | 0.223   | -0.766                  | 0.233    |
| <i>Tyrosine Hydroxylase</i> |                         |         |                         |            |                         |         |                         |         |                         |          |
| OB                          | -0.327                  | 0.389   | -0.159                  | 0.682      | -0.432                  | 0.466   | -0.477                  | 0.194   | 0.41                    | 0.492    |
| POA                         | -0.33                   | 0.351   | -0.376                  | 0.318      | -0.02                   | 0.974   | -0.218                  | 0.571   | 0.013                   | 0.982    |
| TPp                         | -0.285                  | 0.424   | -0.015                  | 0.967      | 0.019                   | 0.975   | 0.056                   | 0.885   | 0.633                   | 0.251    |
| PPv                         | -0.442                  | 0.2     | -0.015                  | 0.966      | -0.68                   | 0.206   | 0.467                   | 0.204   | 0.927                   | *(0.023) |
| PTN                         | -0.294                  | 0.408   | 0.037                   | 0.919      | 0.374                   | 0.534   | 0.129                   | 0.739   | -0.088                  | 0.887    |
| Vc                          | -0.33                   | 0.351   | -0.119                  | 0.759      | -0.151                  | 0.808   | -0.349                  | 0.356   | 0.163                   | 0.792    |
| Vv                          | 0.329                   | 0.352   | -0.187                  | 0.628      | 0.237                   | 0.7     | 0.077                   | 0.843   | 0.379                   | 0.528    |

Supplementary Table 2. *Neurologin-3* optical density (mean  $\pm$  SE) comparisons between “high” (> median) and “low” (< median) glides and transits. \*\* indicates significance after correcting for multiple hypotheses; \* indicates significance that does not survive multiple hypothesis testing; n.s., not significant

| Brain Region    | LL                 |                   |                    | LS                 |                    |                    | FF                |                    |                    |
|-----------------|--------------------|-------------------|--------------------|--------------------|--------------------|--------------------|-------------------|--------------------|--------------------|
|                 | High               | Low               | p-value            | High               | Low                | p-value            | High              | Low                | p-value            |
| <b>Glides</b>   |                    |                   |                    |                    |                    |                    |                   |                    |                    |
| Dm              | 0.012 $\pm$ 0.001  | 0.031 $\pm$ 0.085 | <b>n.s.</b> (0.05) | 0.024 $\pm$ 0.009  | 0.041 $\pm$ 0.015  | <b>n.s.</b> (0.37) | 0.024 $\pm$ 0.014 | 0.026 $\pm$ 0.01   | <b>n.s.</b> (0.92) |
| DI              | 0.01 $\pm$ 0.0003  | 0.028 $\pm$ 0.01  | <b>n.s.</b> (0.1)  | 0.018 $\pm$ 0.005  | 0.027 $\pm$ 0.008  | <b>n.s.</b> (0.38) | 0.019 $\pm$ 0.009 | 0.019 $\pm$ 0.006  | <b>n.s.</b> (0.99) |
| Cb              | 0.042 $\pm$ 0.014  | 0.074 $\pm$ 0.028 | <b>n.s.</b> (0.33) | 0.081 $\pm$ 0.03   | 0.05 $\pm$ 0.014   | <b>n.s.</b> (0.38) | 0.082 $\pm$ 0.035 | 0.038 $\pm$ 0.011  | <b>n.s.</b> (0.28) |
| GC              | 0.005 $\pm$ 0.0008 | 0.007 $\pm$ 0.002 | <b>n.s.</b> (0.44) | 0.006 $\pm$ 0.002  | 0.005 $\pm$ 0.0007 | <b>n.s.</b> (0.57) | 0.009 $\pm$ 0.003 | 0.004 $\pm$ 0.0004 | <b>n.s.</b> (0.24) |
| POA             | 0.028 $\pm$ 0.004  | 0.106 $\pm$ 0.055 | <b>n.s.</b> (0.19) | 0.111 $\pm$ 0.04   | 0.092 $\pm$ 0.034  | <b>n.s.</b> (0.75) | 0.104 $\pm$ 0.054 | 0.116 $\pm$ 0.053  | <b>n.s.</b> (0.88) |
| TA              | 0.026 $\pm$ 0.011  | 0.077 $\pm$ 0.036 | <b>n.s.</b> (0.22) | 0.066 $\pm$ 0.017  | 0.066 $\pm$ 0.012  | <b>n.s.</b> (0.98) | 0.1 $\pm$ 0.034   | 0.065 $\pm$ 0.03   | <b>n.s.</b> (0.46) |
| VH              | 0.054 $\pm$ 0.019  | 0.125 $\pm$ 0.061 | <b>n.s.</b> (0.31) | 0.151 $\pm$ 0.053  | 0.131 $\pm$ 0.028  | <b>n.s.</b> (0.75) | 0.197 $\pm$ 0.08  | 0.132 $\pm$ 0.052  | <b>n.s.</b> (0.52) |
| Vs              | 0.028 $\pm$ 0.003  | 0.117 $\pm$ 0.038 | <b>n.s.</b> (0.05) | 0.073 $\pm$ 0.022  | 0.124 $\pm$ 0.043  | <b>n.s.</b> (0.33) | 0.055 $\pm$ 0.028 | 0.082 $\pm$ 0.043  | <b>n.s.</b> (0.63) |
| Vv              | 0.022 $\pm$ 0.003  | 0.118 $\pm$ 0.039 | <b>*</b> (0.04)    | 0.072 $\pm$ 0.028  | 0.084 $\pm$ 0.014  | <b>n.s.</b> (0.72) | 0.06 $\pm$ 0.04   | 0.086 $\pm$ 0.043  | <b>n.s.</b> (0.68) |
| <b>Transits</b> |                    |                   |                    |                    |                    |                    |                   |                    |                    |
| Dm              | 0.022 $\pm$ 0.01   | 0.02 $\pm$ 0.003  | <b>n.s.</b> (0.8)  | 0.042 $\pm$ 0.015  | 0.022 $\pm$ 0.008  | <b>n.s.</b> (0.31) | 0.024 $\pm$ 0.014 | 0.028 $\pm$ 0.012  | <b>n.s.</b> (0.84) |
| DI              | 0.024 $\pm$ 0.011  | 0.014 $\pm$ 0.002 | <b>n.s.</b> (0.45) | 0.03 $\pm$ 0.007   | 0.016 $\pm$ 0.004  | <b>n.s.</b> (0.14) | 0.019 $\pm$ 0.009 | 0.024 $\pm$ 0.011  | <b>n.s.</b> (0.74) |
| Cb              | 0.083 $\pm$ 0.027  | 0.033 $\pm$ 0.009 | <b>n.s.</b> (0.11) | 0.098 $\pm$ 0.025  | 0.033 $\pm$ 0.01   | <b>*</b> (0.04)    | 0.082 $\pm$ 0.035 | 0.059 $\pm$ 0.031  | <b>n.s.</b> (0.63) |
| GC              | 0.006 $\pm$ 0.001  | 0.006 $\pm$ 0.002 | <b>n.s.</b> (0.98) | 0.006 $\pm$ 0.002  | 0.004 $\pm$ 0.0005 | <b>n.s.</b> (0.3)  | 0.009 $\pm$ 0.003 | 0.006 $\pm$ 0.001  | <b>n.s.</b> (0.48) |
| POA             | 0.098 $\pm$ 0.058  | 0.037 $\pm$ 0.005 | <b>n.s.</b> (0.32) | 0.13 $\pm$ 0.039   | 0.081 $\pm$ 0.033  | <b>n.s.</b> (0.39) | 0.104 $\pm$ 0.054 | 0.089 $\pm$ 0.034  | <b>n.s.</b> (0.82) |
| TA              | 0.068 $\pm$ 0.039  | 0.036 $\pm$ 0.011 | <b>n.s.</b> (0.46) | 0.09 $\pm$ 0.01    | 0.043 $\pm$ 0.008  | <b>*</b> (0.009)   | 0.1 $\pm$ 0.034   | 0.058 $\pm$ 0.024  | <b>n.s.</b> (0.35) |
| VH              | 0.114 $\pm$ 0.064  | 0.067 $\pm$ 0.019 | <b>n.s.</b> (0.5)  | 0.18 $\pm$ 0.045   | 0.102 $\pm$ 0.028  | <b>n.s.</b> (0.18) | 0.197 $\pm$ 0.08  | 0.197 $\pm$ 0.08   | <b>n.s.</b> (0.67) |
| Vs              | 0.082 $\pm$ 0.044  | 0.063 $\pm$ 0.02  | <b>n.s.</b> (0.71) | 0.0135 $\pm$ 0.042 | 0.062 $\pm$ 0.015  | <b>n.s.</b> (0.14) | 0.055 $\pm$ 0.028 | 0.058 $\pm$ 0.024  | <b>n.s.</b> (0.94) |
| Vv              | 0.079 $\pm$ 0.045  | 0.061 $\pm$ 0.022 | <b>n.s.</b> (0.73) | 0.101 $\pm$ 0.022  | 0.055 $\pm$ 0.016  | <b>n.s.</b> (0.13) | 0.06 $\pm$ 0.041  | 0.061 $\pm$ 0.029  | <b>n.s.</b> (0.97) |

Supplementary Table 3. *Tyrosine Hydroxylase* optical density (mean  $\pm$  SE) comparisons between “high” (> median) and “low” (< median) association bias. \*\* indicates significance after correcting for multiple hypotheses; \* indicates significance that does not survive multiple hypothesis testing; n.s., not significant

| Brain Region | LL                |                   |      |                    | LS                |                    |      |                    | FF                |                   |       |                    |
|--------------|-------------------|-------------------|------|--------------------|-------------------|--------------------|------|--------------------|-------------------|-------------------|-------|--------------------|
|              | High              | Low               | t    | p-value            | High              | Low                | t    | p-value            | High              | Low               | t     | p-value            |
| OB           | 0.02 $\pm$ 0.004  | 0.019 $\pm$ 0.002 | 0.1  | <b>n.s.</b> (0.88) | 0.023 $\pm$ 0.003 | 0.018 $\pm$ 0.0008 | 1.4  | <b>n.s.</b> (0.19) | 0.018 $\pm$ 0.001 | 0.022 $\pm$ 0.004 | - 0.7 | <b>n.s.</b> (0.45) |
| Vv           | 0.01 $\pm$ 0.004  | 0.011 $\pm$ 0.004 | -0.1 | <b>n.s.</b> (0.89) | 0.019 $\pm$ 0.009 | 0.006 $\pm$ 0.004  | 1.1  | <b>n.s.</b> (0.27) | 0.004 $\pm$ 0.004 | 0.009 $\pm$ 0.005 | - 0.7 | <b>n.s.</b> (0.46) |
| Vc           | 0.02 $\pm$ 0.002  | 0.019 $\pm$ 0.001 | 0.3  | <b>n.s.</b> (0.76) | 0.02 $\pm$ 0.003  | 0.018 $\pm$ 0.002  | 0.3  | <b>n.s.</b> (0.7)  | 0.02 $\pm$ 0.002  | 0.017 $\pm$ 0.002 | 0.8   | <b>n.s.</b> (0.41) |
| POA          | 0.021 $\pm$ 0.001 | 0.021 $\pm$ 0.001 | 0.06 | <b>n.s.</b> (0.94) | 0.02 $\pm$ 0.002  | 0.018 $\pm$ 0.002  | 0.6  | <b>n.s.</b> (0.52) | 0.024 $\pm$ 0.002 | 0.019 $\pm$ 0.002 | 1.1   | <b>n.s.</b> (0.29) |
| TPp          | 0.048 $\pm$ 0.006 | 0.052 $\pm$ 0.007 | -0.3 | <b>n.s.</b> (0.74) | 0.072 $\pm$ 0.01  | 0.054 $\pm$ 0.005  | 1.4  | <b>n.s.</b> (0.18) | 0.08 $\pm$ 0.019  | 0.05 $\pm$ 0.005  | 1.5   | <b>n.s.</b> (0.17) |
| PPv          | 0.059 $\pm$ 0.01  | 0.054 $\pm$ 0.005 | 0.4  | <b>n.s.</b> (0.64) | 0.058 $\pm$ 0.012 | 0.063 $\pm$ 0.003  | -0.3 | <b>n.s.</b> (0.72) | 0.064 $\pm$ 0.007 | 0.054 $\pm$ 0.006 | 1.0   | <b>n.s.</b> (0.35) |
| PTN          | 0.036 $\pm$ 0.003 | 0.033 $\pm$ 0.002 | 0.6  | <b>n.s.</b> (0.51) | 0.036 $\pm$ 0.008 | 0.418 $\pm$ 0.005  | -0.5 | <b>n.s.</b> (0.6)  | 0.038 $\pm$ 0.005 | 0.034 $\pm$ 0.005 | 0.5   | <b>n.s.</b> (0.62) |

1 Supplementary Table 4: *Tyrosine Hydroxylase* optical density (mean  $\pm$  SE) comparisons between “high”  
2 (> median) and “low” (< median) glides and transits. \*\* indicates significance after correcting for  
3 multiple hypotheses; \* indicates significance that does not survive multiple hypothesis testing; n.s., not  
4 significant

| Brain Region    | LL                |                    |            |                    | LS                |                   |             |                    | FF                |                   |              |                    |
|-----------------|-------------------|--------------------|------------|--------------------|-------------------|-------------------|-------------|--------------------|-------------------|-------------------|--------------|--------------------|
|                 | High              | Low                | t          | p-value            | High              | Low               | t           | p-value            | High              | Low               | t            | p-value            |
| <b>Glides</b>   |                   |                    |            |                    |                   |                   |             |                    |                   |                   |              |                    |
| OB              | 0.019 $\pm$ 0.002 | 0.019 $\pm$ 0.003  | -0.01      | <b>n.s.</b> (0.98) | 0.017 $\pm$ 0.001 | 0.024 $\pm$ 0.003 | <b>-1.8</b> | <b>n.s.</b> (0.09) | 0.016 $\pm$ 0.001 | 0.019 $\pm$ 0.001 | -1.4         | <b>n.s.</b> (0.18) |
| Vv              | 0.01 $\pm$ 0.004  | 0.01 $\pm$ 0.004   | -0.1       | <b>n.s.</b> (0.85) | 0.003 $\pm$ 0.003 | 0.023 $\pm$ 0.008 | <b>-2.2</b> | <b>n.s.</b> (0.05) | 0.01 $\pm$ 0.004  | 0.005 $\pm$ 0.005 | 0.8          | <b>n.s.</b> (0.44) |
| Vc              | 0.019 $\pm$ 0.001 | 0.02 $\pm$ 0.002   | -0.4       | <b>n.s.</b> (0.68) | 0.185 $\pm$ 0.002 | 0.02 $\pm$ 0.003  | <b>-0.5</b> | <b>n.s.</b> (0.61) | 0.014 $\pm$ 0.001 | 0.021 $\pm$ 0.002 | -2.4         | <b>*</b> (0.049)   |
| POA             | 0.019 $\pm$ 0.001 | 0.023 $\pm$ 0.001  | -2.2       | <b>n.s.</b> (0.05) | 0.019 $\pm$ 0.001 | 0.019 $\pm$ 0.002 | <b>-0.1</b> | <b>n.s.</b> (0.85) | 0.015 $\pm$ 0.001 | 0.025 $\pm$ 0.001 | -3.9         | <b>*</b> (0.008)   |
| TPp             | 0.045 $\pm$ 0.005 | 0.055 $\pm$ 0.007  | -1.0       | <b>n.s.</b> (0.34) | 0.065 $\pm$ 0.012 | 0.061 $\pm$ 0.004 | <b>0.3</b>  | <b>n.s.</b> (0.75) | 0.058 $\pm$ 0.01  | 0.083 $\pm$ 0.016 | -1.3         | <b>n.s.</b> (0.24) |
| PPv             | 0.057 $\pm$ 0.004 | 0.056 $\pm$ 0.01   | 0.1        | <b>n.s.</b> (0.92) | 0.066 $\pm$ 0.01  | 0.055 $\pm$ 0.007 | <b>0.8</b>  | <b>n.s.</b> (0.42) | 0.054 $\pm$ 0.007 | 0.068 $\pm$ 0.005 | -1.4         | <b>n.s.</b> (0.2)  |
| PTN             | 0.032 $\pm$ 0.002 | 0.036 $\pm$ 0.002  | -1.0       | <b>n.s.</b> (0.34) | 0.043 $\pm$ 0.004 | 0.034 $\pm$ 0.008 | <b>0.9</b>  | <b>n.s.</b> (0.35) | 0.034 $\pm$ 0.006 | 0.4 $\pm$ 0.005   | -0.7         | <b>n.s.</b> (0.48) |
| <b>Transits</b> |                   |                    |            |                    |                   |                   |             |                    |                   |                   |              |                    |
| OB              | 0.02 $\pm$ 0.003  | 0.019 $\pm$ 0.0008 | 0.2        | <b>n.s.</b> (0.83) | 0.02 $\pm$ 0.002  | 0.002 $\pm$ 0.002 | -0.4        | <b>n.s.</b> (0.65) | 0.01 $\pm$ 0.001  | 0.02 $\pm$ 0.003  | -1.6         | <b>n.s.</b> (0.14) |
| Vv              | 0.01 $\pm$ 0.004  | 0.01 $\pm$ 0.004   | 0.09       | <b>n.s.</b> (0.92) | 0.006 $\pm$ 0.006 | 0.019 $\pm$ 0.008 | -1.3        | <b>n.s.</b> (0.22) | 0.01 $\pm$ 0.004  | 0.005 $\pm$ 0.005 | 0.8          | <b>n.s.</b> (0.44) |
| Vc              | 0.02 $\pm$ 0.002  | 0.02 $\pm$ 0.001   | 0.09       | <b>n.s.</b> (0.92) | 0.018 $\pm$ 0.002 | 0.02 $\pm$ 0.003  | -0.3        | <b>n.s.</b> (0.76) | 0.014 $\pm$ 0.001 | 0.02 $\pm$ 0.001  | -2.3         | <b>n.s.</b> (0.05) |
| POA             | 0.021 $\pm$ 0.001 | 0.021 $\pm$ 0.001  | -0.2       | <b>n.s.</b> (0.77) | 0.018 $\pm$ 0.002 | 0.02 $\pm$ 0.002  | -0.5        | <b>n.s.</b> (0.59) | 0.015 $\pm$ 0.001 | 0.025 $\pm$ 0.001 | -3.8         | <b>*</b> (0.008)   |
| TPp             | 0.043 $\pm$ 0.004 | 0.057 $\pm$ 0.007  | -1.6       | <b>n.s.</b> (0.14) | 0.071 $\pm$ 0.01  | 0.054 $\pm$ 0.006 | 1.3         | <b>n.s.</b> (0.2)  | 0.058 $\pm$ 0.01  | 0.06 $\pm$ 0.01   | -0.1         | <b>n.s.</b> (0.86) |
| PPv             | 0.65 $\pm$ 0.007  | 0.047 $\pm$ 0.005  | 1.8        | <b>n.s.</b> (0.09) | 0.064 $\pm$ 0.012 | 0.057 $\pm$ 0.003 | 0.5         | <b>n.s.</b> (0.6)  | 0.054 $\pm$ 0.007 | 0.064 $\pm$ 0.005 | -1.1         | <b>n.s.</b> (0.31) |
| PTN             | 0.035 $\pm$ 0.024 | 0.033 $\pm$ 0.003  | <b>0.3</b> | <b>n.s.</b> (0.7)  | 0.039 $\pm$ 0.008 | 0.038 $\pm$ 0.005 | <b>0.1</b>  | <b>n.s.</b> (0.9)  | 0.034 $\pm$ 0.006 | 0.034 $\pm$ 0.001 | <b>-0.05</b> | <b>n.s.</b> (0.96) |
